# Supplementary material
Source: PubMed Central journal article supplement (PMC9233058)
Supplement: NIHMS1792672-supplement-supplemental_figures.pdf [file NIHMS1792672-supplement-supplemental_figures.pdf]

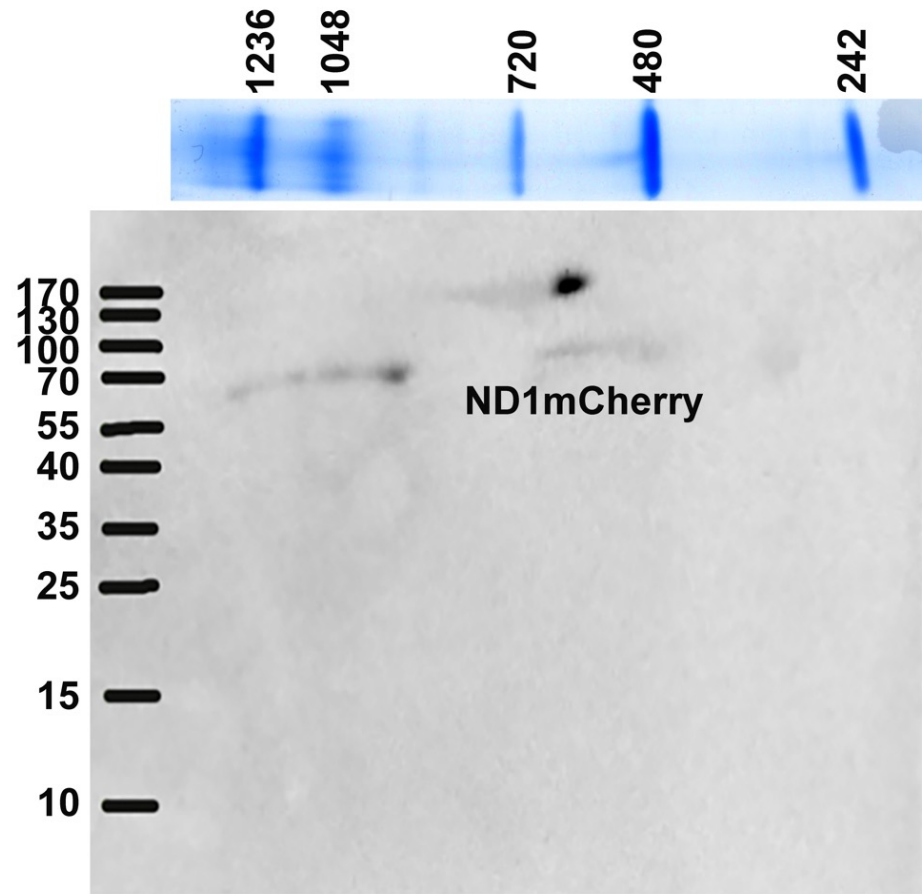

Fig S1. Expressed hND1mCherry is assembled into complex I

**A**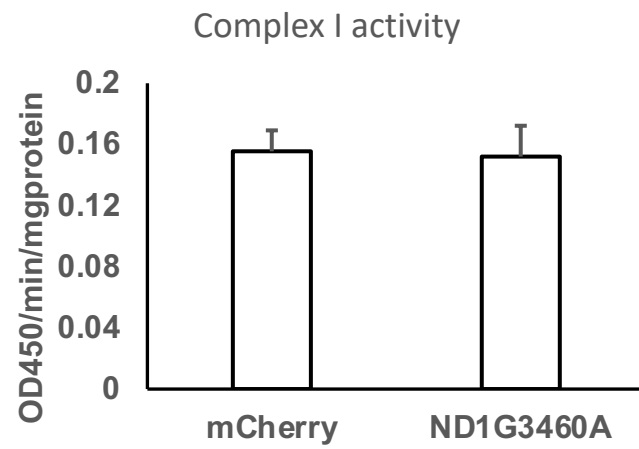**B**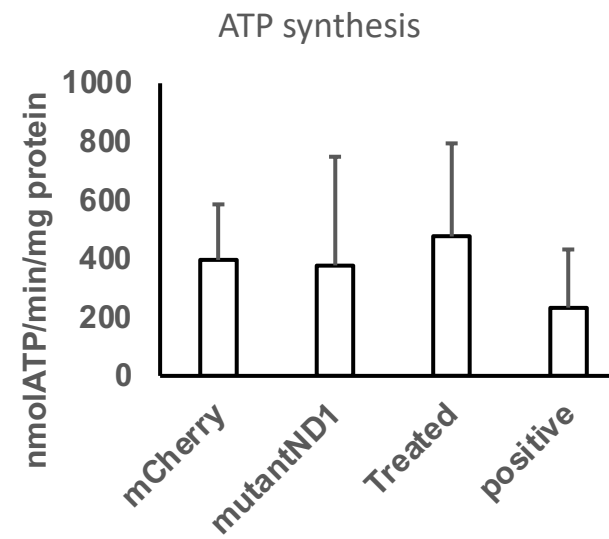

**Fig S2. Respiration function in the retina.** (A. two-tailed t-tests, B. one-way ANOVA analysis of variance; Tukey's multiple comparisons tests)

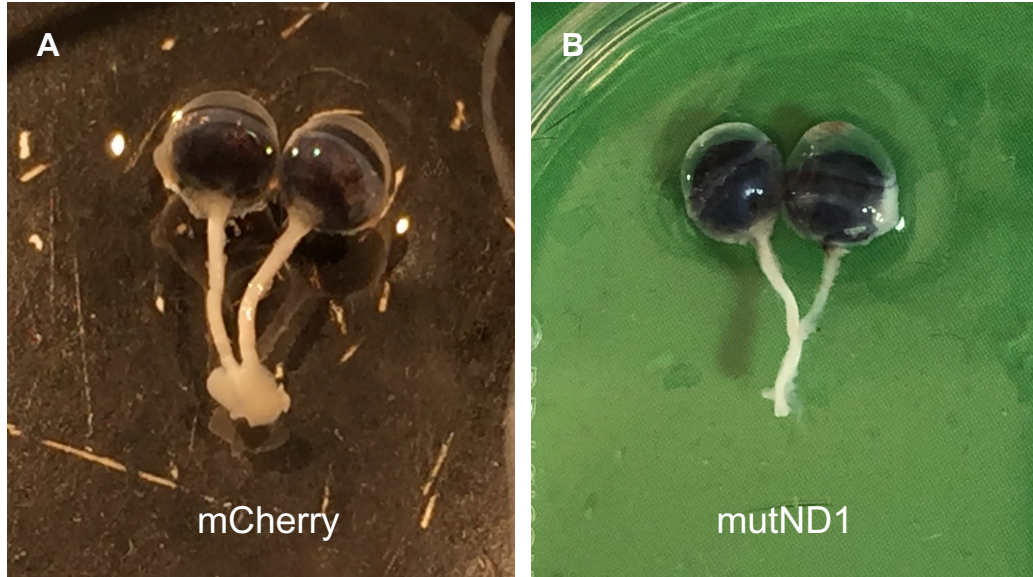

Fig S3. mutant ND1 induce thinning of the entire optic nerve 15 months after injection

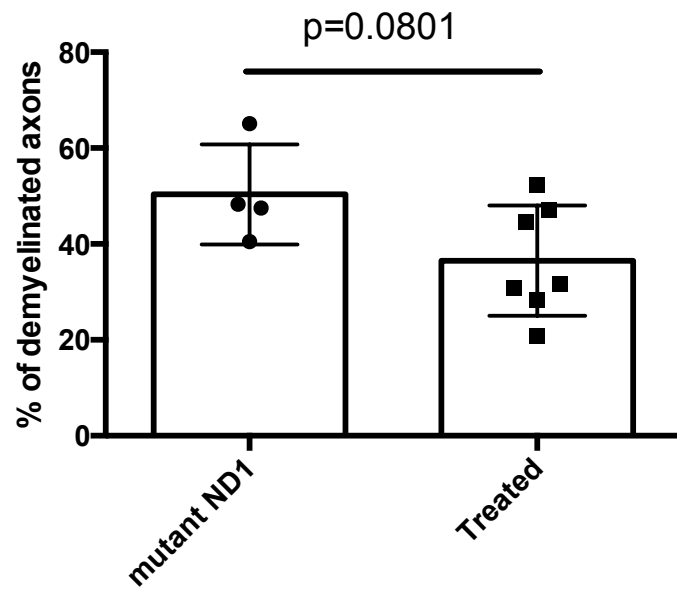

Fig S4. mutant ND1 tends to induce more axon demyelinated (two-tailed t-tests)

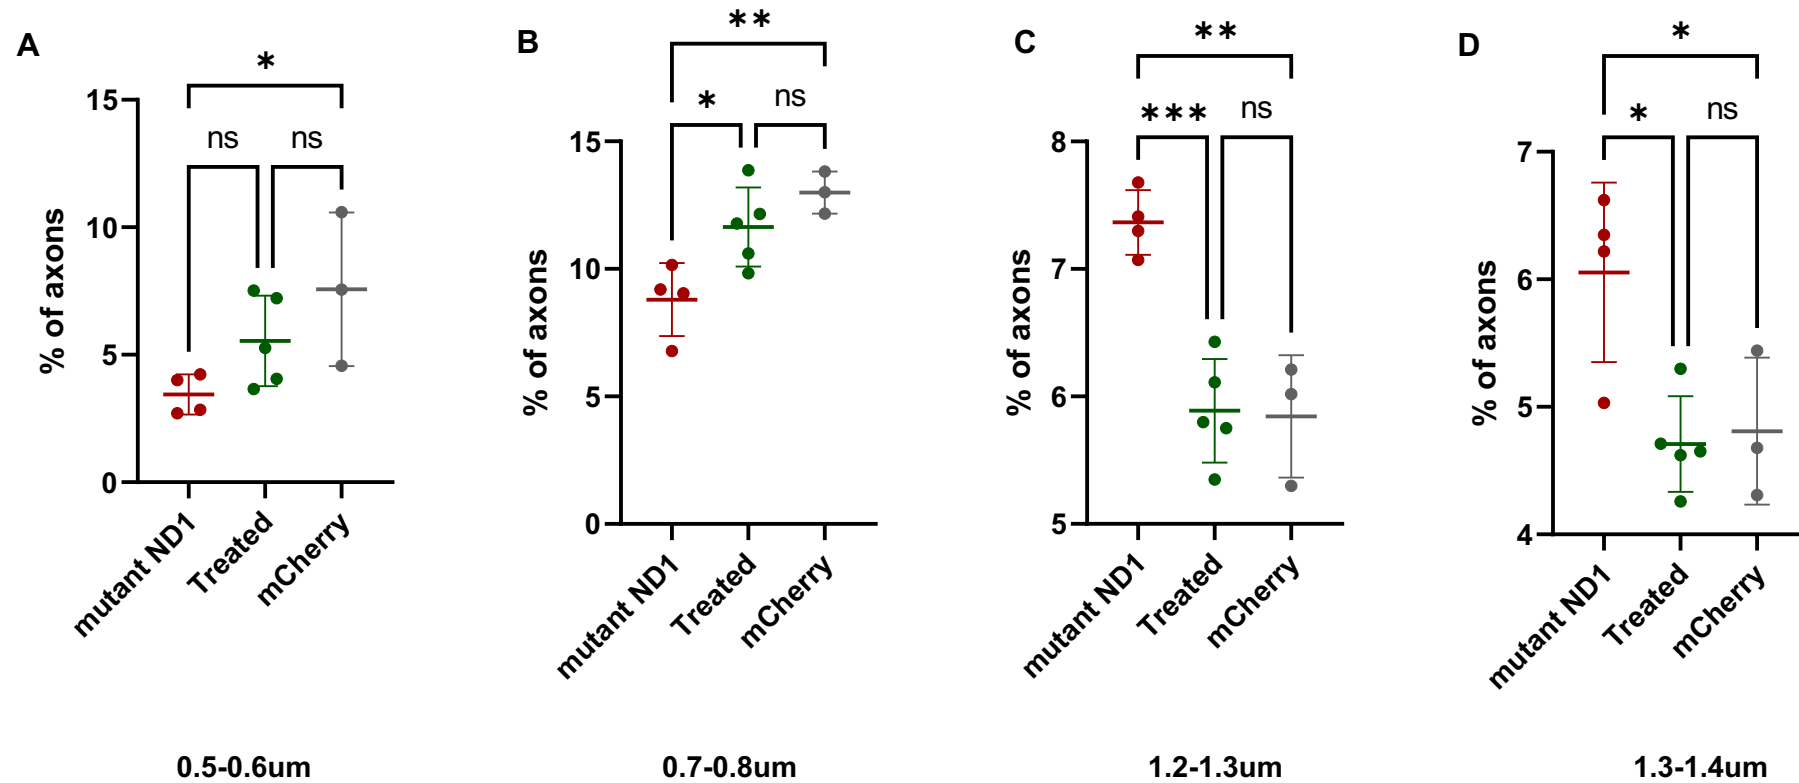

**Fig S5. mutant ND1 induce small axon loss and axon swollen (one-way ANOVA analysis of variance; Tukey's multiple comparisons tests)**
